# Supplementary material for: Genetic Polymorphisms Affecting Ranibizumab Response in High Myopia Patients
Source: MDPI journal article supplement (doi:10.3390/pharmaceutics13111973), 2021-11-20
Supplement: s1 [file s1]

# Supplementary Materials: Genetic Polymorphisms Affecting Ranibizumab Response in High Myopia Patients

David Blázquez-Martínez, Xando Díaz-Villamarín\*, Alba Antúnez-Rodríguez, Ana Pozo-Agundo, José Ignacio Muñoz-Ávila, Luis Javier Martínez-González and Cristina Lucía Dávila-Fajardo

Table S1: Genotypes association with BCVA improvement/worsening at 1 month.

| SNP               | Genotype | IMPROVEMENT  |             |                              |                   |         |       |       |
|-------------------|----------|--------------|-------------|------------------------------|-------------------|---------|-------|-------|
|                   |          | YES<br>n (%) | NO<br>n (%) | Genetic model<br>(reference) | OR (95%CI)        | p-value | AIC   | BIC   |
| CXCL8<br>rs4073   | T/T      | 20 (26.3)    | 9 (25)      | Codominant (TT)<br>a         | 1.14 (0.44-2.93)  | 0.890   | 146.4 | 154.6 |
|                   | T/A      | 41 (54)      | 21 (58.3)   | Codominant (TT)<br>b         | 0.89 (0.26-3.04)  |         |       |       |
|                   | A/A      | 15 (19.7)    | 6 (16.7)    | Dominant (TT)                | 1.07 (0.43-2.66)  | 0.880   | 144.6 | 150.1 |
|                   |          |              |             | Recessive (AA)               | 1.23 (0.43-3.49)  | 0.700   | 144.5 | 149.9 |
|                   |          |              |             | Overdominant<br>(TA)         | 0.84 (0.38-1.87)  | 0.660   | 144.5 | 149.9 |
|                   |          |              |             | Log-additive                 | 1.04 (0.57-1.89)  | 0.900   | 144.6 | 150.1 |
| NRP1<br>rs2070296 | C/C      | 55 (72.4)    | 25 (69.4)   | Codominant (CC)<br>c         | 1.27 (0.53-3.07)  | 0.400   | 144.8 | 153   |
|                   | T/C      | 19 (25)      | 11 (30.6)   | Codominant (CC)<br>d         | 0.00 (0.00-NA)    |         |       |       |
|                   | T/T      | 2 (2.6)      | 0 (0)       | Dominant (CC)                | 1.15 (0.48-2.75)  | 0.750   | 144.6 | 150   |
|                   |          |              |             | Recessive (TT)               | NA (0.00-NA)      | 0.210   | 143.1 | 148.5 |
|                   |          |              |             | Overdominant<br>(TC)         | 0.76 (0.31-1.82)  | 0.540   | 144.3 | 149.7 |
|                   |          |              |             | Log-additive                 | 0.99 (0.45-2.19)  | 0.980   | 144.7 | 150.1 |
| F13A1<br>rs5985   | C/C      | 46 (60.5)    | 22 (61.1)   | Codominant (CC)<br>e         | 1.01 (0.44-2.32)  | 0.950   | 146.6 | 154.7 |
|                   | A/C      | 27 (35.5)    | 13 (36.1)   | Codominant (CC)<br>f         | 0.70 (0.07-7.09)  |         |       |       |
|                   | A/A      | 3 (4)        | 1 (2.8)     | Dominant (CC)                | 0.98 (0.43-2.20)  | 0.950   | 144.7 | 150.1 |
|                   |          |              |             | Recessive (AA)               | 1.44 (0.14-14.33) | 0.750   | 144.6 | 150   |
|                   |          |              |             | Overdominant<br>(AC)         | 0.97 (0.43-2.23)  | 0.950   | 144.7 | 150.1 |
|                   |          |              |             | Log-additive                 | 1.06 (0.52-2.15)  | 0.880   | 144.6 | 150.1 |

|                    |     |              |             |                      |                   |             |       |       |
|--------------------|-----|--------------|-------------|----------------------|-------------------|-------------|-------|-------|
| VEGFA<br>rs3025040 | C/C | 57 (75)      | 30 (83.3)   | Codominant (CC)<br>g | 0.63 (0.23-1.76)  | 0.450       | 145.1 | 153.2 |
|                    | T/C | 13 (23.7)    | 6 (16.7)    | Codominant (CC)<br>h | 0.00 (0.00-NA)    |             |       |       |
|                    | T/T | 1 (1.3)      | 0 (0)       | Dominant (CC)        | 0.60 (0.22-1.66)  | 0.310       | 143.6 | 149.1 |
|                    |     |              |             | Recessive (TT)       | NA (0.00-NA)      | 0.380       | 143.9 | 149.3 |
|                    |     |              |             | Overdominant<br>(TC) | 1.55 (0.56-4.32)  | 0.390       | 143.9 | 149.4 |
|                    |     |              |             | Log-additive         | 1.71 (0.64-4.55)  | 0.270       | 143.4 | 148.9 |
| WORSENING          |     |              |             |                      |                   |             |       |       |
|                    |     | YES<br>n (%) | NO<br>n (%) | Genetic model        | OR (95%CI)        | P-<br>value | AIC   | BIC   |
| CXCL8<br>rs4073    | T/T | 2 (25)       | 27 (26)     | Codominant (TT)<br>a | 1.46 (0.23-9.23)  | 0.400       | 61.8  | 70    |
|                    | T/A | 3 (37.5)     | 59 (56.7)   | Codominant (TT)<br>b | 0.44 (0.07-2.93)  |             |       |       |
|                    | A/A | 3 (37.5)     | 18 (17.3)   | Dominant (TT)        | 0.95 (0.18-5.00)  | 0.950       | 61.6  | 67.1  |
|                    |     |              |             | Recessive (AA)       | 2.87 (0.63-13.09) | 0.190       | 60    | 65.4  |
|                    |     |              |             | Overdominant<br>(TA) | 0.46 (0.10-2.02)  | 0.290       | 60.5  | 66    |
|                    |     |              |             | Log-additive         | 1.62 (0.54-4.83)  | 0.390       | 60.9  | 66.3  |
| NRP1<br>rs2070296  | C/C | 7 (87.5)     | 73 (70.2)   | Codominant (CC)<br>c | 2.78 (0.33-23.61) | 0.500       | 62.2  | 70.4  |
|                    | T/C | 1 (12.5)     | 29 (27.9)   | Codominant (CC)<br>d | NA (0.00-NA)      |             |       |       |
|                    | T/T | 0 (0)        | 2 (1.9)     | Dominant (CC)        | 2.97 (0.35-25.19) | 0.260       | 60.4  | 65.8  |
|                    |     |              |             | Recessive (TT)       | 0.00 (0.00-NA)    | 0.580       | 61.3  | 66.8  |
|                    |     |              |             | Overdominant<br>(TC) | 0.37 (0.04-3.14)  | 0.310       | 60.6  | 66    |
|                    |     |              |             | Log-additive         | 0.34 (0.04-2.74)  | 0.250       | 60.3  | 65.7  |
| F13A1<br>rs5985    | C/C | 3 (37.5)     | 65 (62.5)   | Codominant (CC)<br>e | 0.32 (0.07-1.43)  | 0.230       | 60.7  | 68.9  |
|                    | A/C | 5 (62.5)     | 35 (33.6)   | Codominant (CC)<br>f | NA (0.00-NA)      |             |       |       |
|                    | A/A | 0 (0)        | 4 (3.8)     | Dominant (CC)        | 0.36 (0.08-1.59)  | 0.170       | 59.7  | 65.2  |
|                    |     |              |             | Recessive (AA)       | 0.00 (0.00-NA)    | 0.440       | 61    | 66.5  |
|                    |     |              |             | Overdominant<br>(AC) | 3.29 (0.74-14.55) | 0.110       | 59.1  | 64.5  |
|                    |     |              |             | Log-additive         | 1.82 (0.57-5.86)  | 0.320       | 60.7  | 66.1  |
| VEGFA<br>rs3025040 | C/C | 6 (75)       | 81 (77.9)   | Codominant (CC)<br>g | 0.81 (0.15-4.32)  | 0.900       | 63.4  | 71.6  |

|                                                                                                                                                                                                                                                                                                                                                                |     |        |           |                      |                  |       |      |      |
|----------------------------------------------------------------------------------------------------------------------------------------------------------------------------------------------------------------------------------------------------------------------------------------------------------------------------------------------------------------|-----|--------|-----------|----------------------|------------------|-------|------|------|
|                                                                                                                                                                                                                                                                                                                                                                | T/C | 2 (25) | 22 (21.1) | Codominant (CC)<br>h | NA (0.00-NA)     |       |      |      |
|                                                                                                                                                                                                                                                                                                                                                                | T/T | 0 (0)  | 1 (1)     | Dominant (CC)        | 0.85 (0.16-4.51) | 0.850 | 61.6 | 67   |
|                                                                                                                                                                                                                                                                                                                                                                |     |        |           | Recessive (TT)       | 0.00 (0.00-NA)   | 0.700 | 61.5 | 66.9 |
|                                                                                                                                                                                                                                                                                                                                                                |     |        |           | Overdominant<br>(TC) | 1.24 (0.23-6.59) | 0.800 | 61.6 | 67   |
|                                                                                                                                                                                                                                                                                                                                                                |     |        |           | Log-additive         | 1.10 (0.23-5.34) | 0.810 | 61.6 | 67.1 |
| SNP: Single Nucleotide Polymorphism; OR: Odds Ratio; CI: Confidence Interval; AIC: Akaike information criterion; BIC: Bayesian information criterion; NA: Not applicable<br>a: T/T vs T/A; b: T/T vs A/A; c: C/C vs T/C; d: C/C vs T/T; e: C/C vs A/C; f: C/C vs A/A; g: C/C vs T/C; h: C/C vs T/T; i: G/G vs T/G; j: G/G vs T/T; k: T/T vs T/C; l: T/T vs C/C |     |        |           |                      |                  |       |      |      |

Table S2: CXCL8 (rs4073), NRP1(rs2070296), F13A1 (rs5985) and VEGFA (rs3025040) genotype association with BCVA improvement/worsening at 6 months.

| SNP               | Genotype | IMPROVEMENT  |             |                              |                   |         |       |       |
|-------------------|----------|--------------|-------------|------------------------------|-------------------|---------|-------|-------|
|                   |          | YES<br>n (%) | NO<br>n (%) | Genetic model<br>(reference) | OR (95%CI)        | p-value | AIC   | BIC   |
| CXCL8<br>rs4073   | T/T      | 20 (25)      | 9 (28.1)    | Codominant (TT)<br>a         | 0.84 (0.32-2.20)  | 0.940   | 139.9 | 148   |
|                   | T/A      | 45 (56.2)    | 17 (53.1)   | Codominant (TT)<br>b         | 0.89 (0.26-3.04)  |         |       |       |
|                   | A/A      | 15 (18.8)    | 6 (18.8)    | Dominant (TT)                | 0.85 (0.34-2.14)  | 0.730   | 137.9 | 143.3 |
|                   |          |              |             | Recessive (AA)               | 1 (0.35-2.86)     | 1       | 138   | 143.4 |
|                   |          |              |             | Overdominant<br>(TA)         | 1.13 (0.50-2.58)  | 0.760   | 137.9 | 143.4 |
|                   |          |              |             | Log-additive                 | 1.07 (0.58-1.99)  | 0.82    | 138   | 143.4 |
| NRP1<br>rs2070296 | C/C      | 55 (68.8)    | 25 (78.1)   | Codominant (CC)<br>c         | 0.67 (0.25-1.76)  | 0.360   | 138   | 146.1 |
|                   | T/C      | 23 (28.8)    | 7 (21.9)    | Codominant (CC)<br>d         | 0.00 (0.00-NA)    |         |       |       |
|                   | T/T      | 2 (2.5)      | 0 (0)       | Dominant (CC)                | 0.62 (0.24-1.61)  | 0.310   | 137   | 142.4 |
|                   |          |              |             | Recessive (TT)               | NA (0.00-NA)      | 0.240   | 136.7 | 142.1 |
|                   |          |              |             | Overdominant<br>(TC)         | 1.44 (0.55-3.79)  | 0.450   | 137.4 | 142.9 |
|                   |          |              |             | Log-additive                 | 1.69 (0.68-4.19)  | 0.240   | 136.6 | 142.1 |
| F13A1<br>rs5985   | C/C      | 49 (61.2)    | 19 (59.4)   | Codominant (CC)<br>e         | 1.11 (0.47-2.61)  | 0.960   | 139.9 | 148.1 |
|                   | A/C      | 28 (35)      | 12 (37.5)   | Codominant (CC)<br>f         | 0.86 (0.08-8.79)  |         |       |       |
|                   | A/A      | 3 (3.8)      | 1 (3.1)     | Dominant (CC)                | 1.08 (0.47-2.50)  | 0.850   | 138   | 143.4 |
|                   |          |              |             | Recessive (AA)               | 1.21 (0.12-12.06) | 0.870   | 138   | 143.4 |
|                   |          |              |             | Overdominant<br>(AC)         | 0.90 (0.38-2.10)  | 0.800   | 138   | 143.4 |

|                    |     |              |             |                      |                  |             |       |       |
|--------------------|-----|--------------|-------------|----------------------|------------------|-------------|-------|-------|
|                    |     |              |             | Log-additive         | 0.96 (0.47-1.99) | 0.920       | 138   | 143.4 |
| VEGFA<br>rs3025040 | C/C | 63 (78.8)    | 24 (75)     | Codominant (CC)<br>g | 1.31 (0.50-3.46) | 0.610       | 139   | 147.2 |
|                    | T/C | 16 (20)      | 8 (25)      | Codominant (CC)<br>h | 0.00 (0.00-NA)   |             |       |       |
|                    | T/T | 1 (1.2)      | 0 (0)       | Dominant (CC)        | 1.24 (0.47-3.24) | 0.670       | 137.8 | 143.3 |
|                    |     |              |             | Recessive (TT)       | NA (0.00-NA)     | 0.410       | 137.3 | 142.8 |
|                    |     |              |             | Overdominant<br>(TC) | 0.75 (0.28-1.98) | 0.560       | 137.7 | 143.1 |
|                    |     |              |             | Log-additive         | 0.88 (0.36-2.19) | 0.790       | 137.9 | 143.4 |
| WORSENING          |     |              |             |                      |                  |             |       |       |
|                    |     | YES<br>n (%) | NO<br>n (%) | Genetic model        | OR (95%CI)       | p-<br>value | AIC   | BIC   |
| CXCL8<br>rs4073    | T/T | 3 (21.4)     | 26 (26.5)   | Codominant (TT)<br>a | 0.68 (0.17-2.72) | 0.770       | 89.9  | 98    |
|                    | T/A | 9 (64.3)     | 53 (54.1)   | Codominant (TT)<br>b | 1.10 (0.17-7.21) |             |       |       |
|                    | A/A | 2 (14.3)     | 19 (19.4)   | Dominant (TT)        | 0.76 (0.20-2.92) | 0.680       | 88.2  | 93.7  |
|                    |     |              |             | Recessive (AA)       | 0.69 (0.14-3.36) | 0.640       | 88.2  | 93.6  |
|                    |     |              |             | Overdominant<br>(TA) | 1.53 (0.48-4.89) | 0.470       | 87.9  | 93.3  |
|                    |     |              |             | Log-additive         | 1.00 (0.43-2.32) | NA          | 88.4  | 93.8  |
| NRP1<br>rs2070296  | C/C | 11 (78.6)    | 69 (70.4)   | Codominant (CC)<br>c | 1.43 (0.37-5.55) | 0.660       | 89.6  | 97.7  |
|                    | T/C | 3 (21.4)     | 27 (27.6)   | Codominant (CC)<br>d | NA (0.00-NA)     |             |       |       |
|                    | T/T | 0 (0)        | 2 (2)       | Dominant (CC)        | 1.54 (0.40-5.93) | 0.520       | 88    | 93.4  |
|                    |     |              |             | Recessive (TT)       | 0.00 (0.00-NA)   | 0.460       | 87.9  | 93.3  |
|                    |     |              |             | Overdominant<br>(TC) | 0.72 (0.19-2.77) | 0.620       | 88.2  | 93.6  |
|                    |     |              |             | Log-additive         | 0.63 (0.17-2.26) | 0.460       | 87.8  | 93.3  |
| F13A1<br>rs5985    | C/C | 9 (64.3)     | 59 (60.2)   | Codominant (CC)<br>e | 1.07 (0.33-3.44) | 0.580       | 89.3  | 97.5  |
|                    | A/C | 5 (35.7)     | 35 (35.7)   | Codominant (CC)<br>f | NA (0.00-NA)     |             |       |       |
|                    | A/A | 0 (0)        | 4 (4.1)     | Dominant (CC)        | 1.19 (0.37-3.82) | 0.770       | 88.3  | 93.7  |
|                    |     |              |             | Recessive (AA)       | 0.00 (0.00-NA)   | 0.300       | 87.3  | 92.7  |
|                    |     |              |             | Overdominant<br>(AC) | 1.00 (0.31-3.22) | NA          | 88.4  | 93.8  |
|                    |     |              |             | Log-additive         | 0.76 (0.27-2.19) | 0.610       | 88.1  | 93.6  |
| VEGFA<br>rs3025040 | C/C | 9 (64.3)     | 78 (79.6)   | Codominant (CC)<br>g | 0.44 (0.13-1.46) | 0.380       | 88.4  | 96.6  |

|                                                                                                                                                                                                                                           |     |          |           |                      |                  |       |      |      |
|-------------------------------------------------------------------------------------------------------------------------------------------------------------------------------------------------------------------------------------------|-----|----------|-----------|----------------------|------------------|-------|------|------|
|                                                                                                                                                                                                                                           | T/C | 5 (35.7) | 19 (19.4) | Codominant (CC)<br>h | NA (0.00-NA)     |       |      |      |
|                                                                                                                                                                                                                                           | T/T | 0 (0)    | 1 (1)     | Dominant (CC)        | 0.46 (0.14-1.53) | 0.220 | 86.9 | 92.3 |
|                                                                                                                                                                                                                                           |     |          |           | Recessive (TT)       | 0.00 (0.00-NA)   | 0.600 | 88.1 | 93.6 |
|                                                                                                                                                                                                                                           |     |          |           | Overdominant<br>(TC) | 2.31 (0.69-7.69) | 0.190 | 86.7 | 92.1 |
|                                                                                                                                                                                                                                           |     |          |           | Log-additive         | 1.88 (0.62-5.72) | 0.280 | 87.2 | 92.7 |
| SNP: Single Nucleotide Polymorphism; OR: Odds Ratio; CI: Confidence Interval; AIC: Akaike information<br>criterion; BIC: Bayesian information criterion; NA: Not applicable<br>a: G/G vs T/G; b: G/G vs T/T; c: T/T vs T/C; d: T/T vs C/C |     |          |           |                      |                  |       |      |      |

Table S3: VEGFA haplotype association with response.

| VEGFA haplotype association with response (n=112, crude analysis) |          |           |           |           |           |        |                   |         |
|-------------------------------------------------------------------|----------|-----------|-----------|-----------|-----------|--------|-------------------|---------|
| IMPROVEMENT AT 1 MONTH                                            |          |           |           |           |           |        |                   |         |
| rs25648                                                           | rs699947 | rs3025000 | rs1570360 | rs3025040 | rs2010963 | Freq   | OR (95% CI)       | p-value |
| C                                                                 | C        | T         | G         | C         | C         | 0,289  | 1,00              | -       |
| C                                                                 | A        | C         | A         | C         | G         | 0,2732 | 2,16 (0,99-4,72)  | 0,057   |
| C                                                                 | C        | C         | G         | C         | G         | 0,1658 | 2,35 (0,94-5,87)  | 0,07    |
| T                                                                 | A        | C         | G         | C         | G         | 0,1419 | 0,58 (0,24-1,39)  | 0,23    |
| C                                                                 | C        | T         | G         | T         | C         | 0,0547 | 5,02 (0,63-40,08) | 0,13    |
| C                                                                 | A        | C         | A         | T         | G         | 0,0214 |                   |         |
| WORSENING AT 1 MONTH                                              |          |           |           |           |           |        |                   |         |
| rs25648                                                           | rs699947 | rs3025000 | rs1570360 | rs3025040 | rs2010963 | Freq   | OR (95% CI)       | p-value |
| C                                                                 | C        | T         | G         | C         | C         | 0,2864 | 1,00              | -       |
| C                                                                 | A        | C         | A         | C         | G         | 0,2691 | 0,37 (0,07-1,93)  | 0,24    |
| C                                                                 | C        | C         | G         | C         | G         | 0,1727 | 0,73 (0,15-3,55)  | 0,69    |
| T                                                                 | A        | C         | G         | C         | G         | 0,1394 | 1,11 (0,29-4,27)  | 0,88    |
| C                                                                 | C        | T         | G         | T         | C         | 0,0553 |                   |         |
| IMPROVEMENT AT 6 MONTH                                            |          |           |           |           |           |        |                   |         |
| rs25648                                                           | rs699947 | rs3025000 | rs1570360 | rs3025040 | rs2010963 | Freq   | OR (95% CI)       | p-value |
| C                                                                 | C        | T         | G         | C         | C         | 0,2897 | 1,00              | -       |
| C                                                                 | A        | C         | A         | C         | G         | 0,272  | 0,99 (0,47-2,09)  | 0,99    |
| C                                                                 | C        | C         | G         | C         | G         | 0,167  | 2,64 (0,90-7,78)  | 0,081   |
| T                                                                 | A        | C         | G         | C         | G         | 0,1407 | 0,85 (0,36-2,02)  | 0,71    |
| C                                                                 | C        | T         | G         | T         | C         | 0,054  | 0,50 (0,11-2,22)  | 0,36    |
| C                                                                 | A        | C         | A         | T         | G         | 0,0227 |                   |         |
| WORSENING AT 6 MONTH                                              |          |           |           |           |           |        |                   |         |
| rs25648                                                           | rs699947 | rs3025000 | rs1570360 | rs3025040 | rs2010963 | Freq   | OR (95% CI)       | p-value |
| C                                                                 | C        | T         | G         | C         | C         | 0,2904 | 1,00              | -       |
| C                                                                 | A        | C         | A         | C         | G         | 0,2726 | 0,41 (0,13-1,29)  | 0,24    |
| C                                                                 | C        | C         | G         | C         | G         | 0,165  | 0,15 (0,02-1,17)  | 0,69    |
| T                                                                 | A        | C         | G         | C         | G         | 0,1417 | 0,61 (0,19-2,00)  | 0,88    |

|   |   |   |   |   |   |        |                   |      |
|---|---|---|---|---|---|--------|-------------------|------|
| C | C | T | G | T | C | 0,0533 | 3,08 (0,65-14,57) | 0,16 |
| C | A | C | A | T | G | 0,022  |                   |      |

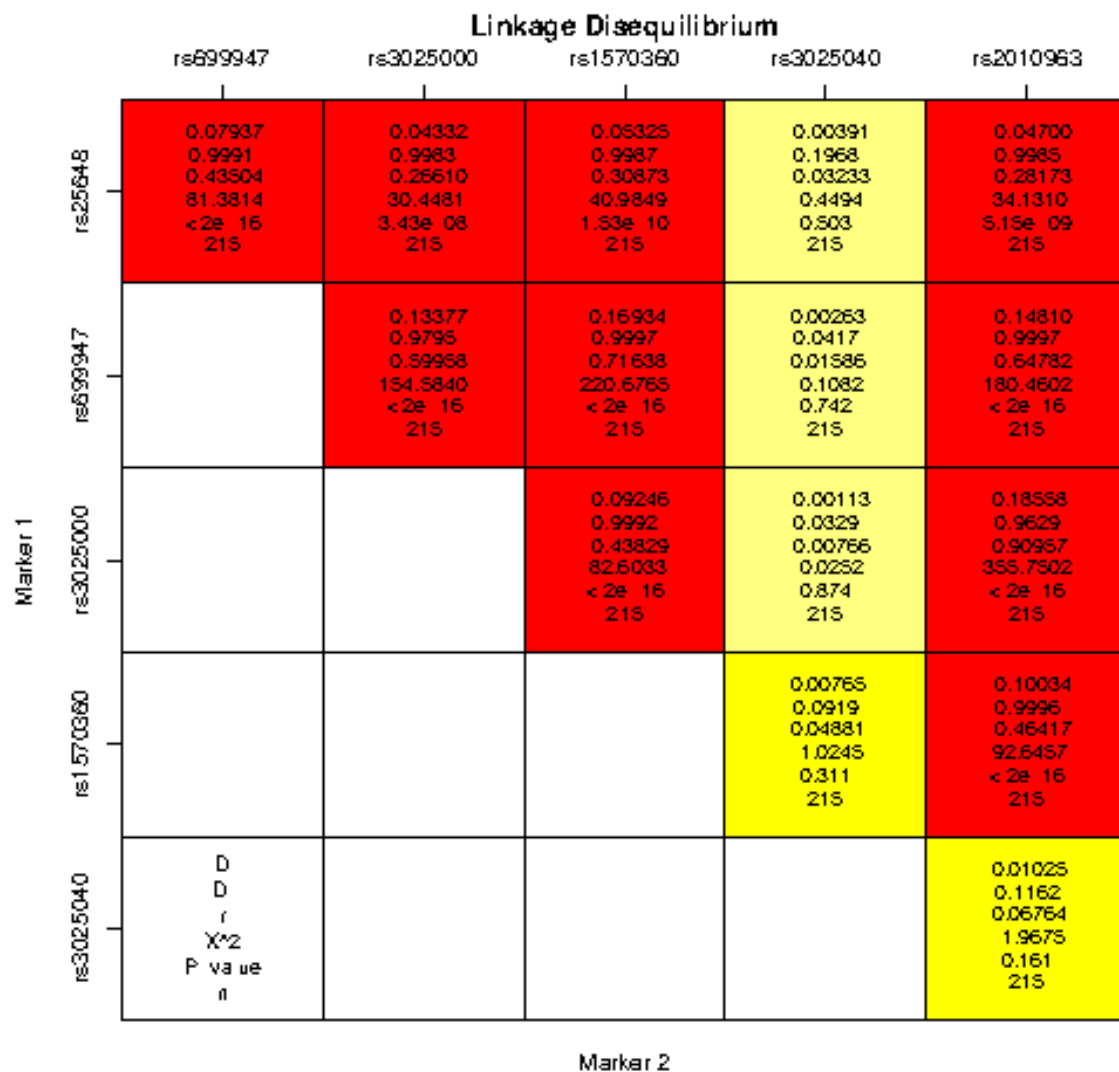

Figure S1: Linkage disequilibrium analysis for VEGFA gene.
